# Supplementary material for: Effects of the duration of postresuscitation hyperoxic ventilation on neurological outcome and survival in an asphyxial cardiac arrest rat model
Source: PubMed Central journal article supplement (PMC6848183; doi:10.1038/s41598-019-52477-y), 2019-11-11
Supplement: 41598_2019_52477_MOESM1_ESM.pdf [file 41598_2019_52477_MOESM1_ESM.pdf]

**Title:** Effects of the duration of postresuscitation hyperoxic ventilation on neurological outcome and survival in an asphyxial cardiac arrest rat model

**Authors:** Tongyi Hu<sup>1</sup>, Jianjie Wang<sup>1</sup>, Shuangwei Wang<sup>2</sup>, Jingru Li<sup>1</sup>, Bihua Chen<sup>1</sup>, Feng Zuo<sup>3</sup>, Lei Zhang<sup>4</sup>, Yuanyuan Huang<sup>5</sup>, Yongqin Li<sup>1</sup>

1 Department of Biomedical Engineering and Imaging Medicine, Army Medical University, Chongqing 400038, China

2 Shenzhen Dashen Institute of Biomedical Engineering Translation, Shenzhen 518060, China

3 Department of Information Technology, Southwest Hospital, Army Medical University, Chongqing 400038, China

4 Department of Emergency, Southwest Hospital, Army Medical University, Chongqing 400038, China

5 Department of Neurology, Southwest Hospital, Army Medical University, Chongqing 400038, China

**Address for correspondence:**

Yongqin Li, MSBME, PhD. Department of Biomedical Engineering and Imaging Medicine, Army Medical University. 30 Gaotanyan Main Street, Chongqing 400038, China.

Tel: (086) 23-6877-1725, Fax: (086) 23-6875-2329

E-mail: leeoken@gmail.com, leeoken@aliyun.com

**Supplementary figure S1:** The micrographs (magnification,  $\times 400$ ) of the hematoxylin and eosin-stained CA1 region of the hippocampus 96 h after resuscitation in the surviving animals

(A). normoxic control under normothermia (NNC) group

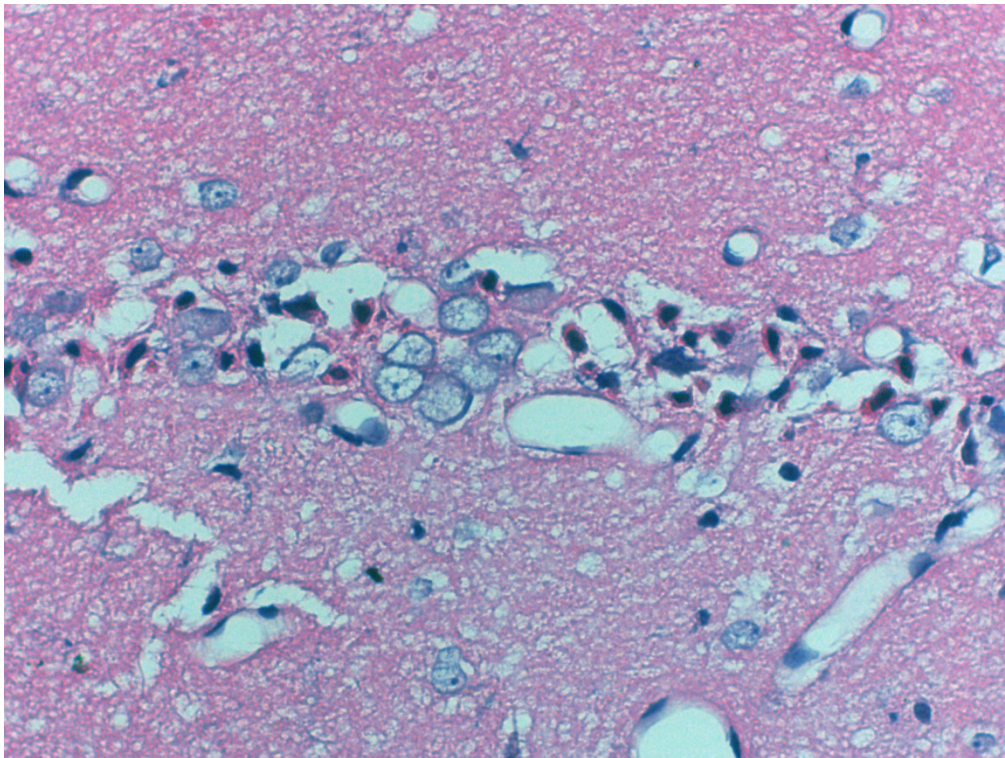

NNC\_2

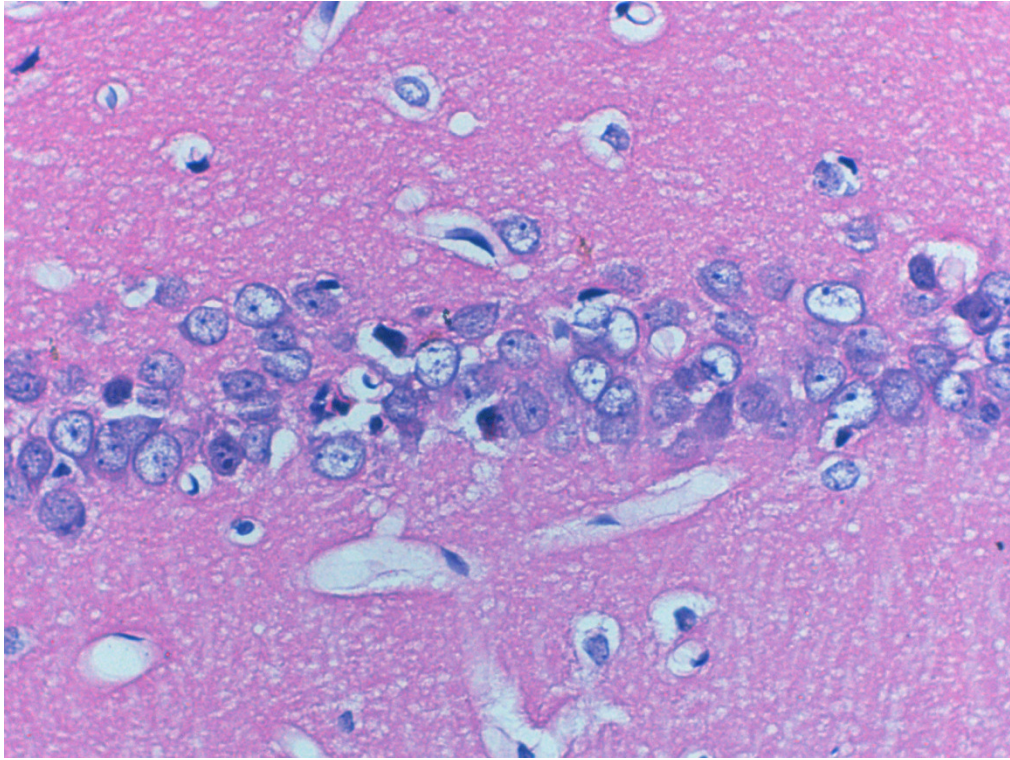

NNC\_3

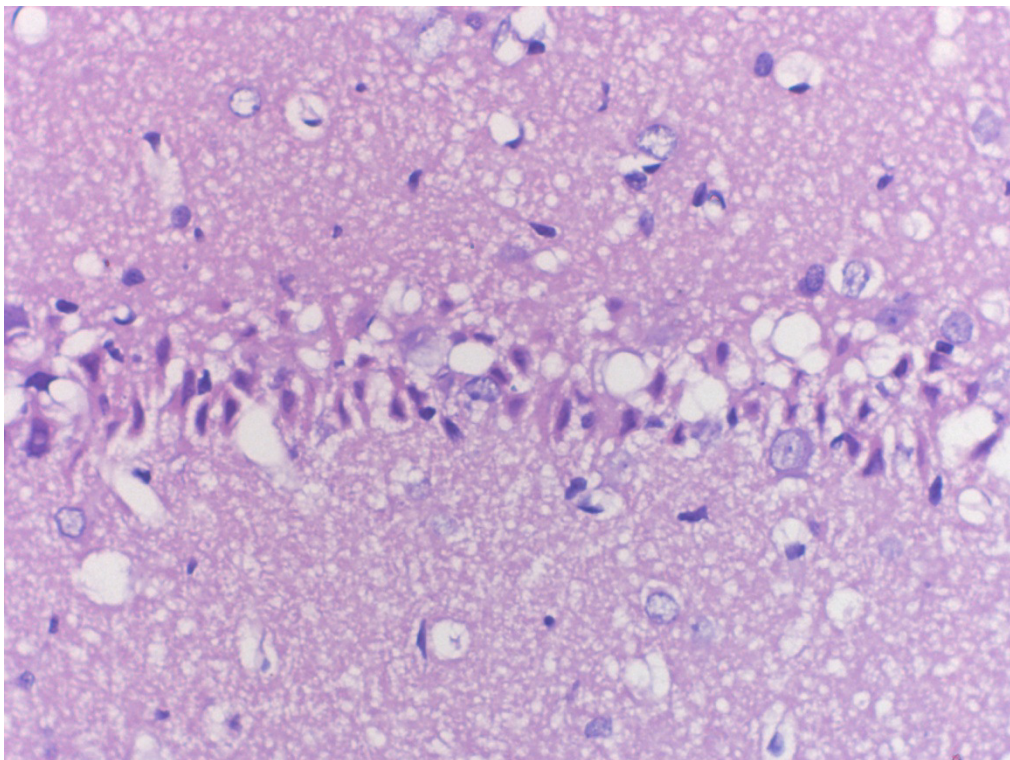

NNC\_8



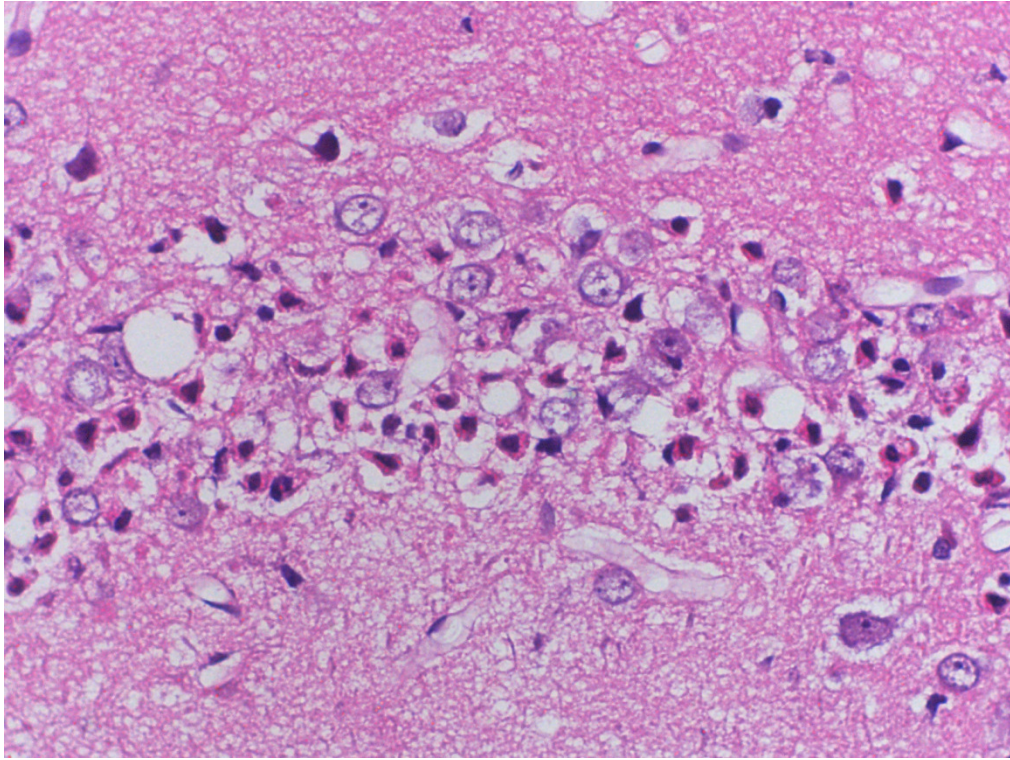

NNC\_9

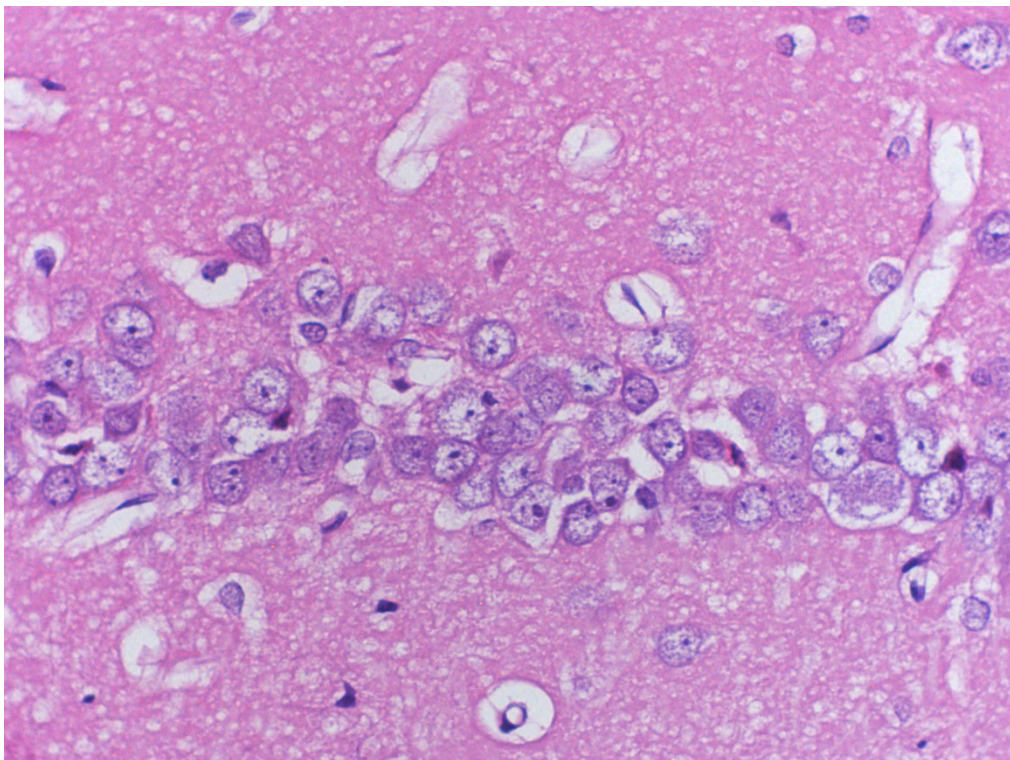

NNC\_12



(B). ventilated with 100% oxygen for 0 (O<sub>2</sub>\_0h) hour group

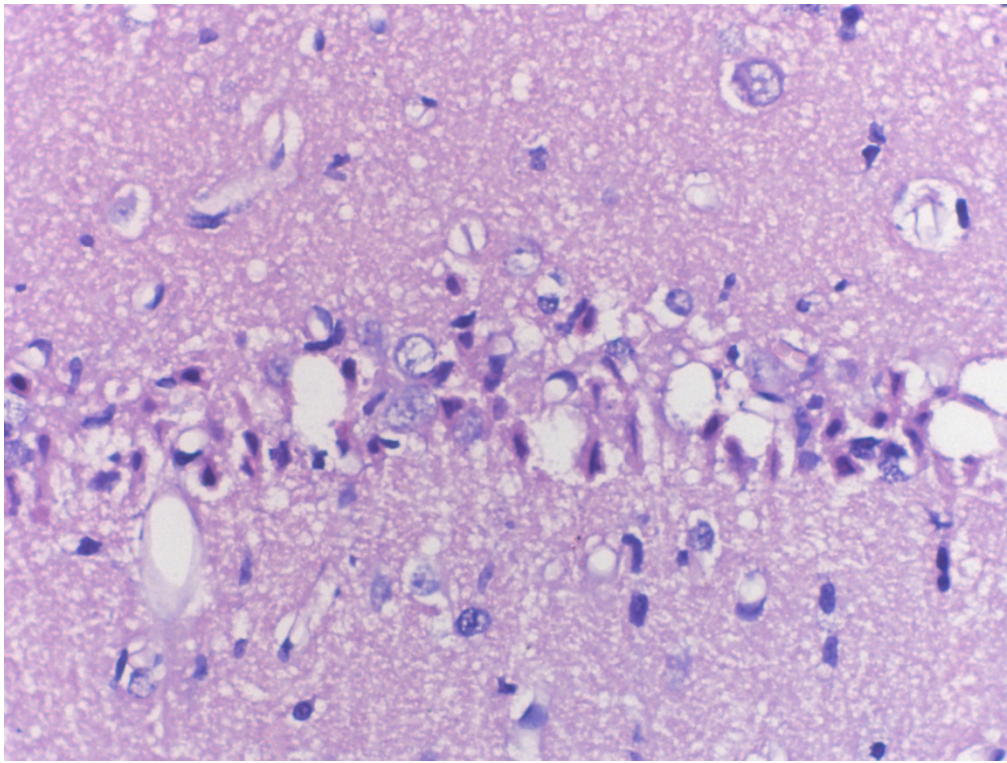

O2\_0h\_4

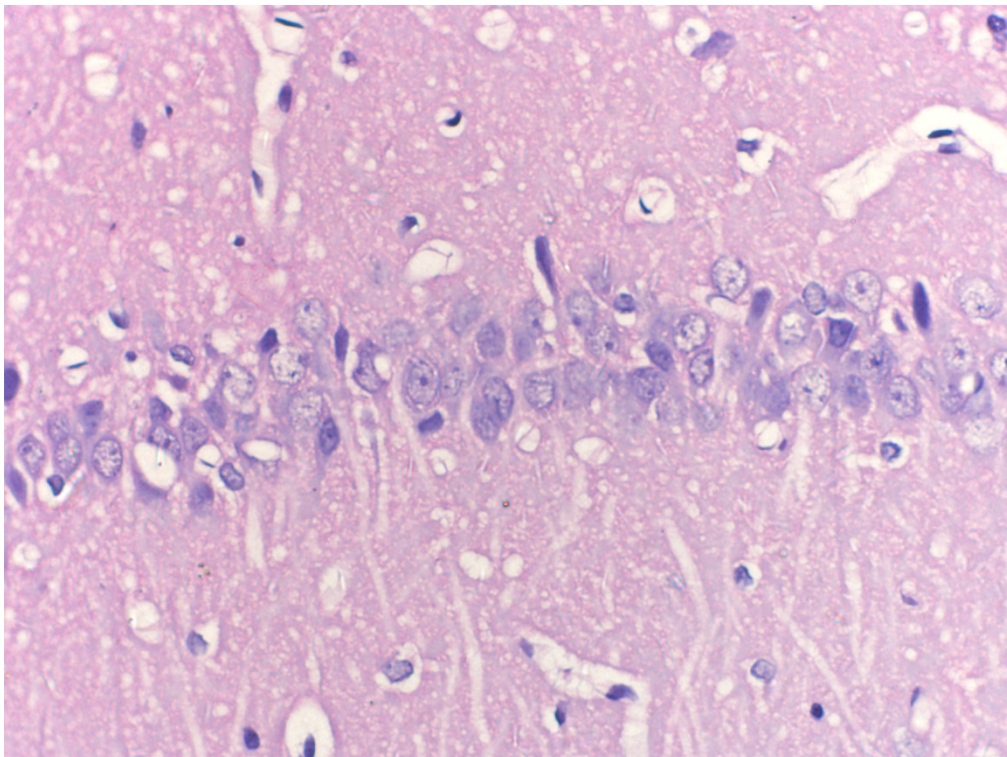

O2\_0h\_6



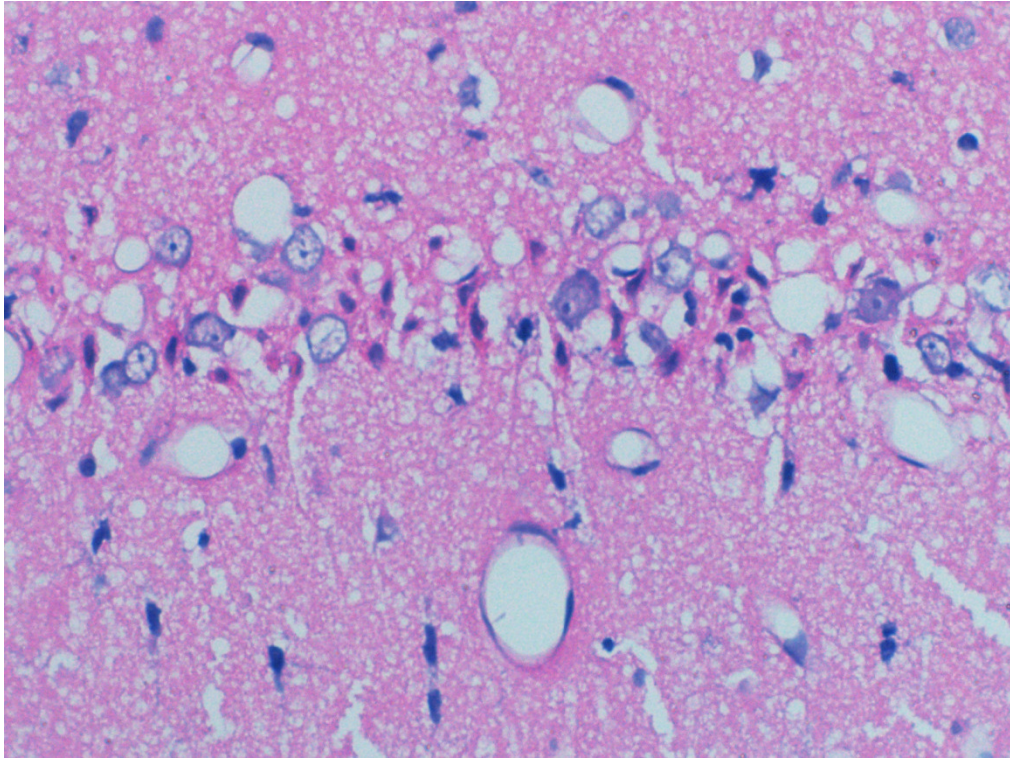

O2\_0h\_9

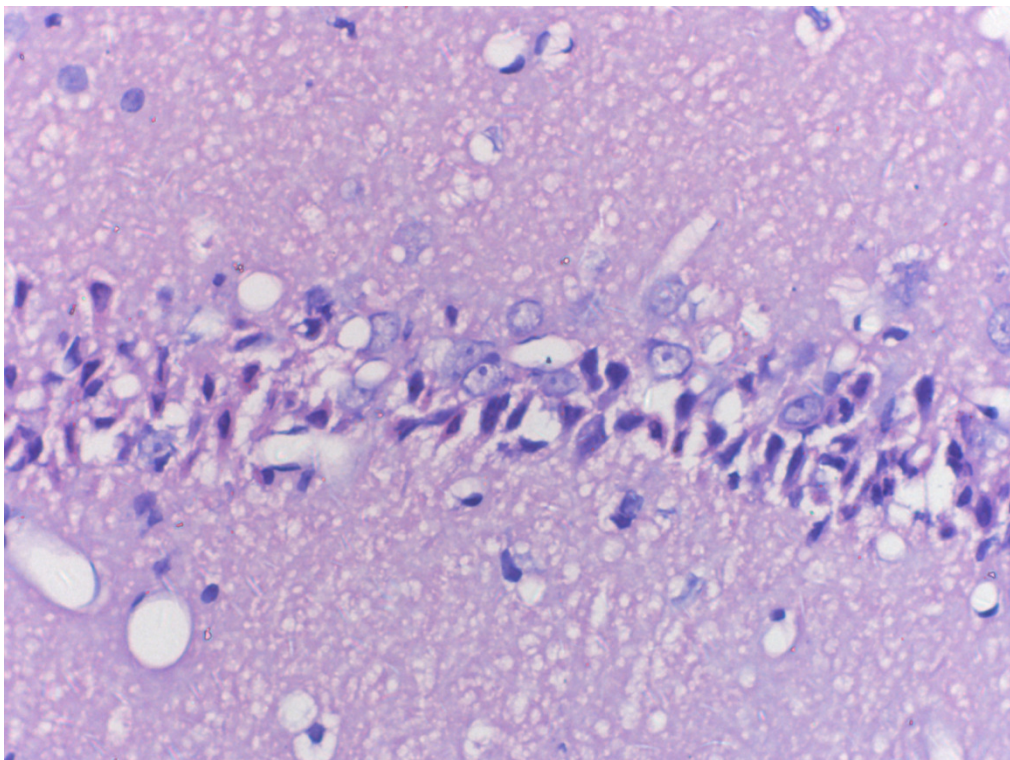

O2\_0h\_10



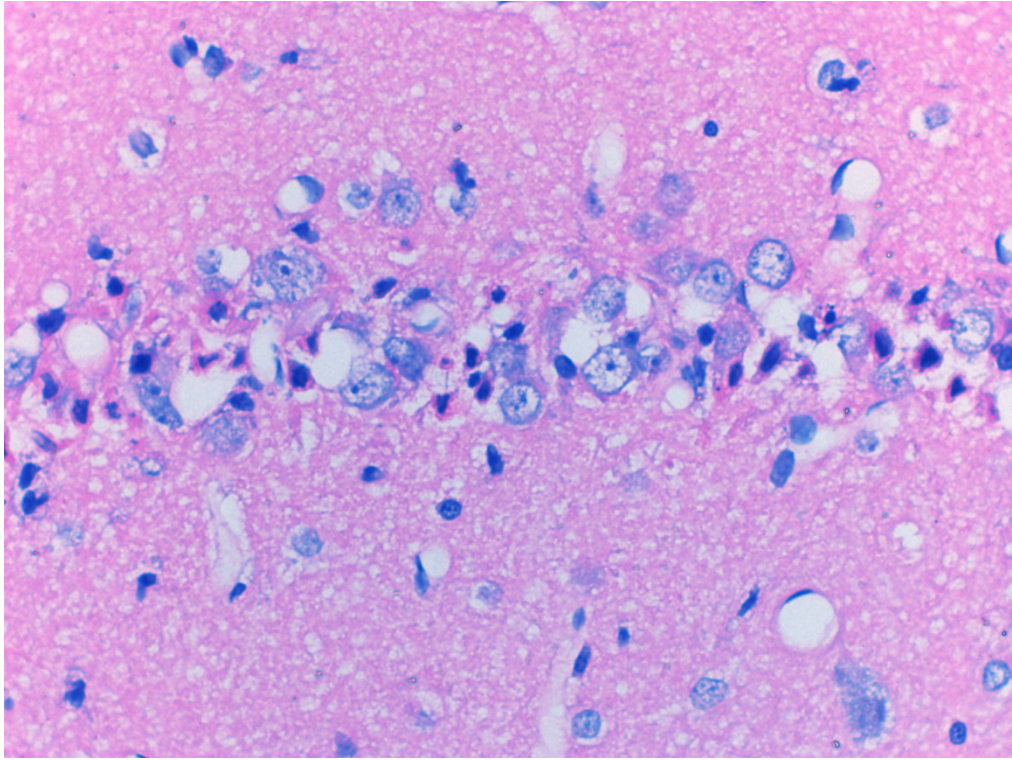

O2\_0h\_15

(C). ventilated with 100% oxygen for 1 (O<sub>2</sub>\_1h) hour group

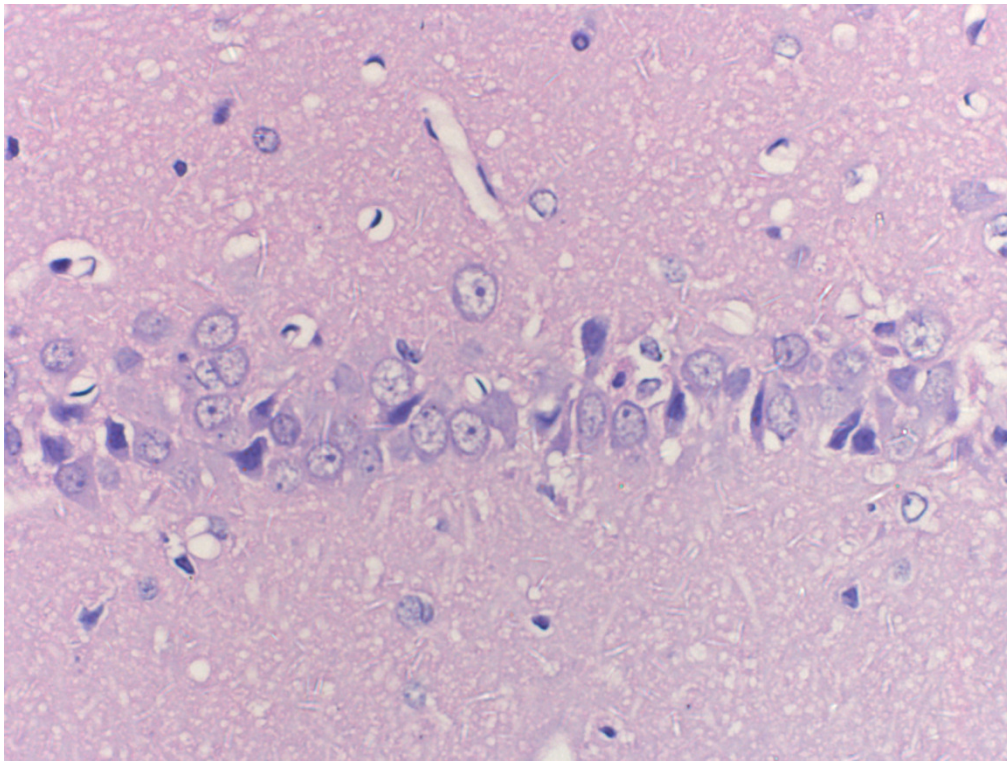

O2\_1h\_3

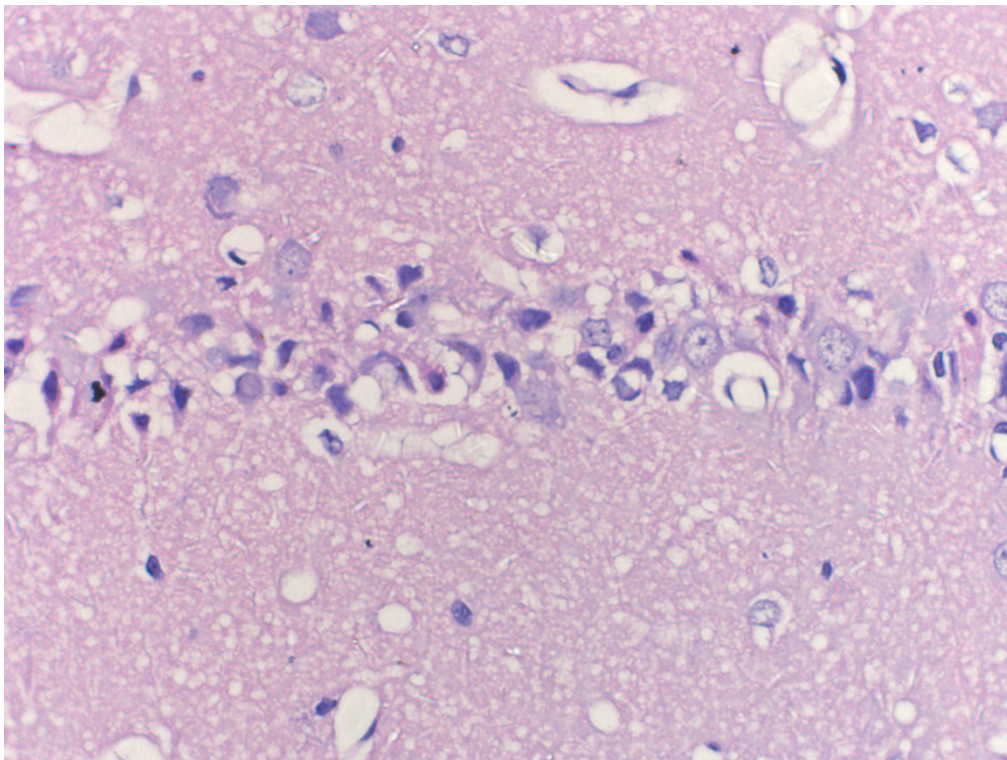

O2\_1h\_4



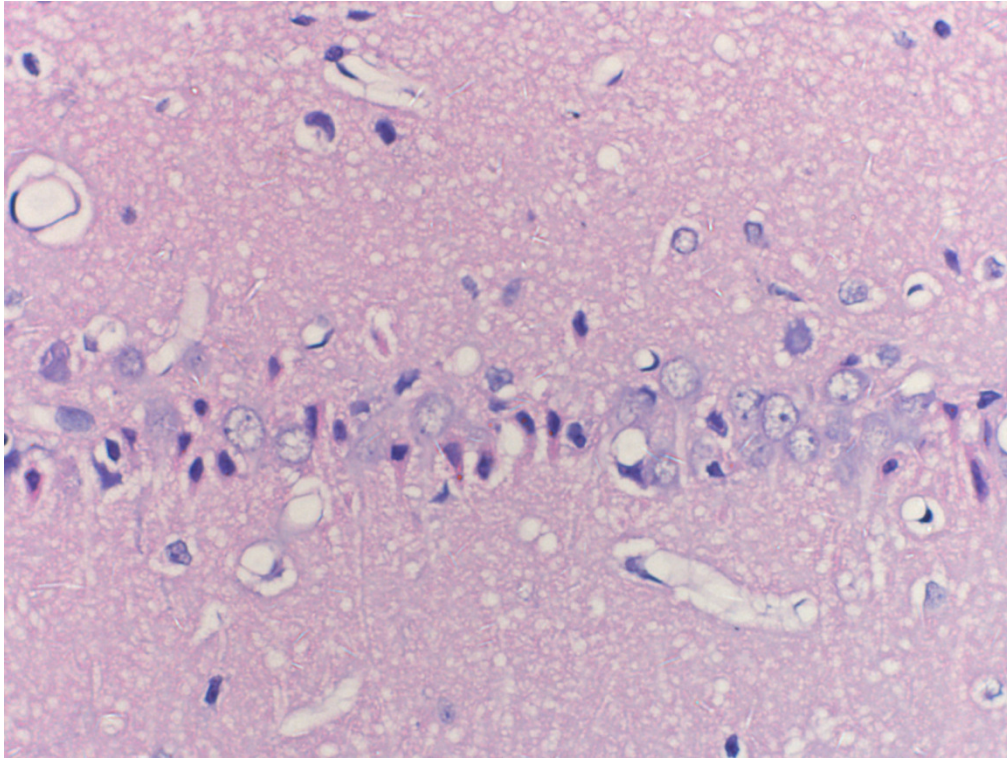

O2\_1h\_11

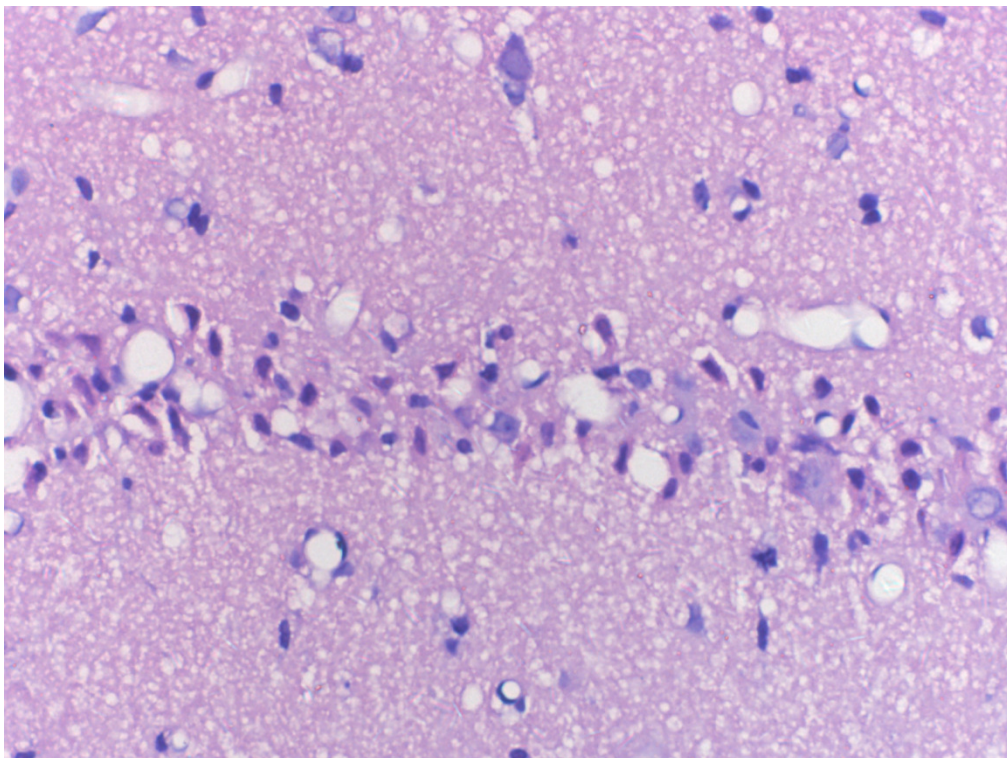

O2\_1h\_14



(D). ventilated with 100% oxygen for 3 (O<sub>2</sub>\_3h) hour group

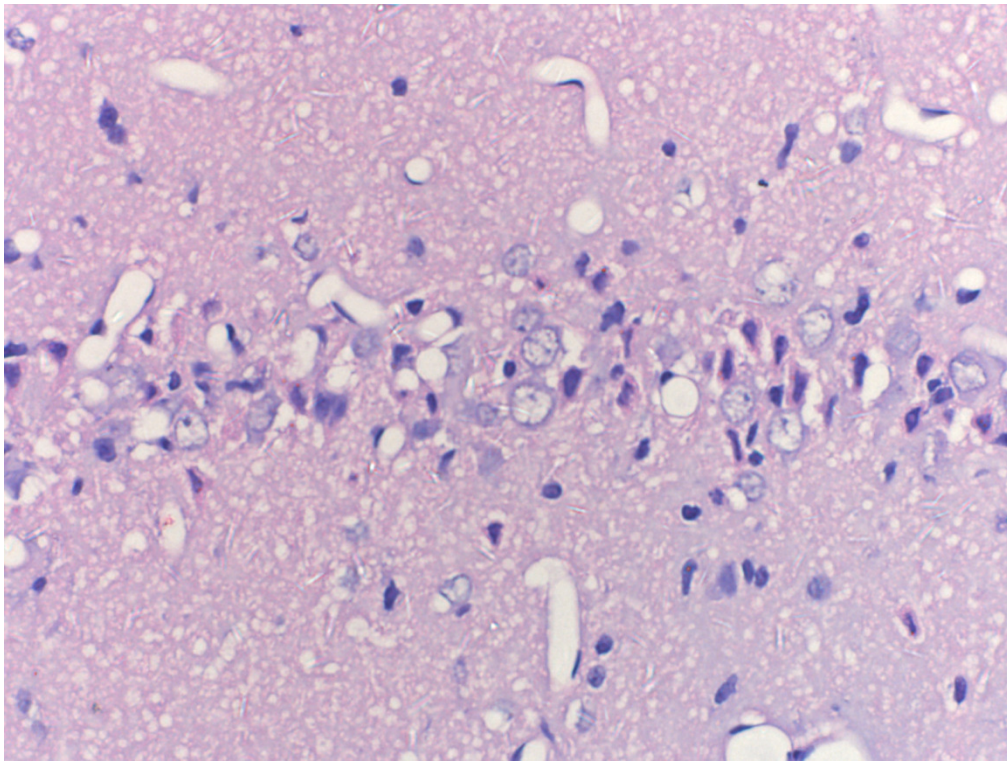

O<sub>2</sub>\_3h\_1

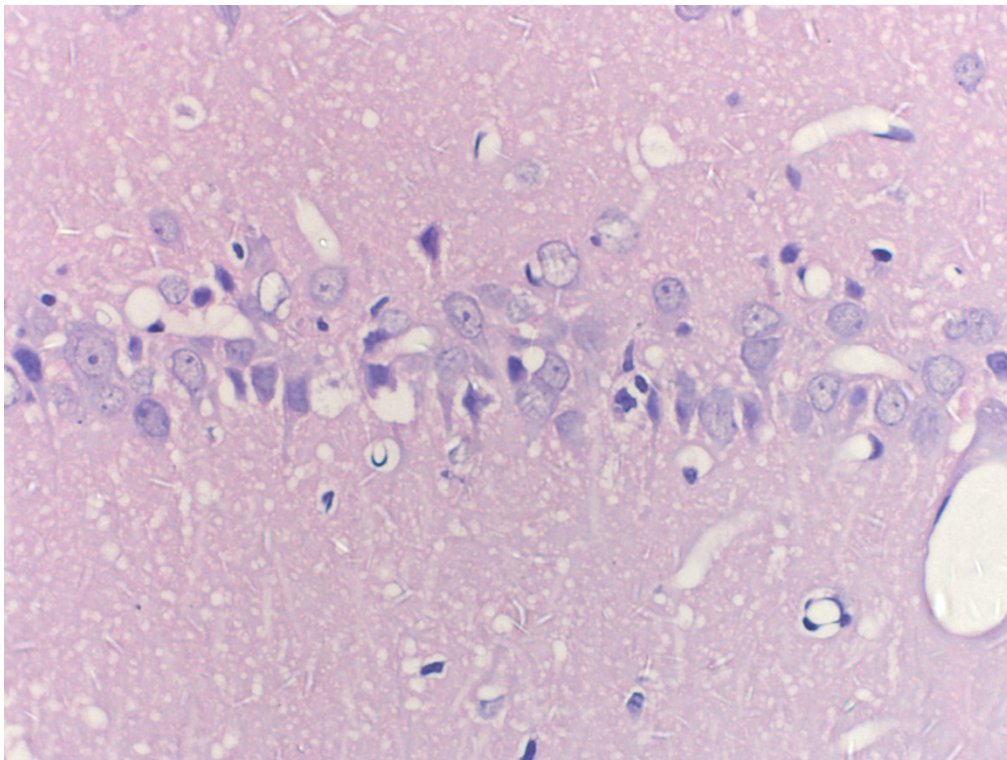

O<sub>2</sub>\_3h\_2



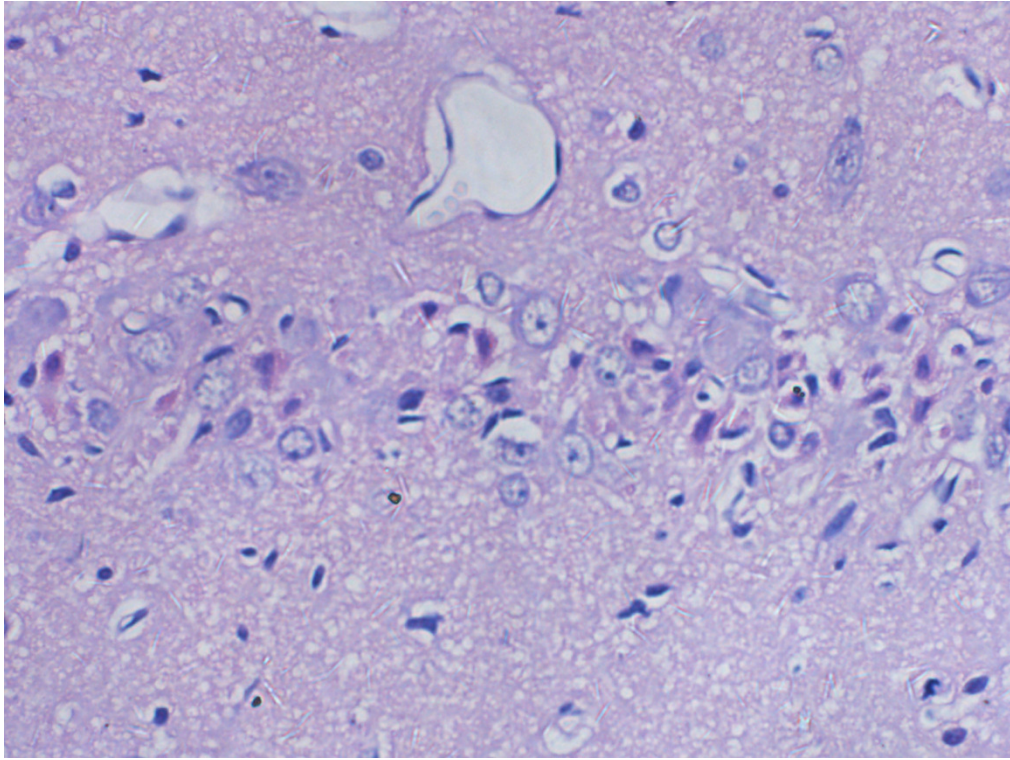

O<sub>2</sub>\_3h\_5

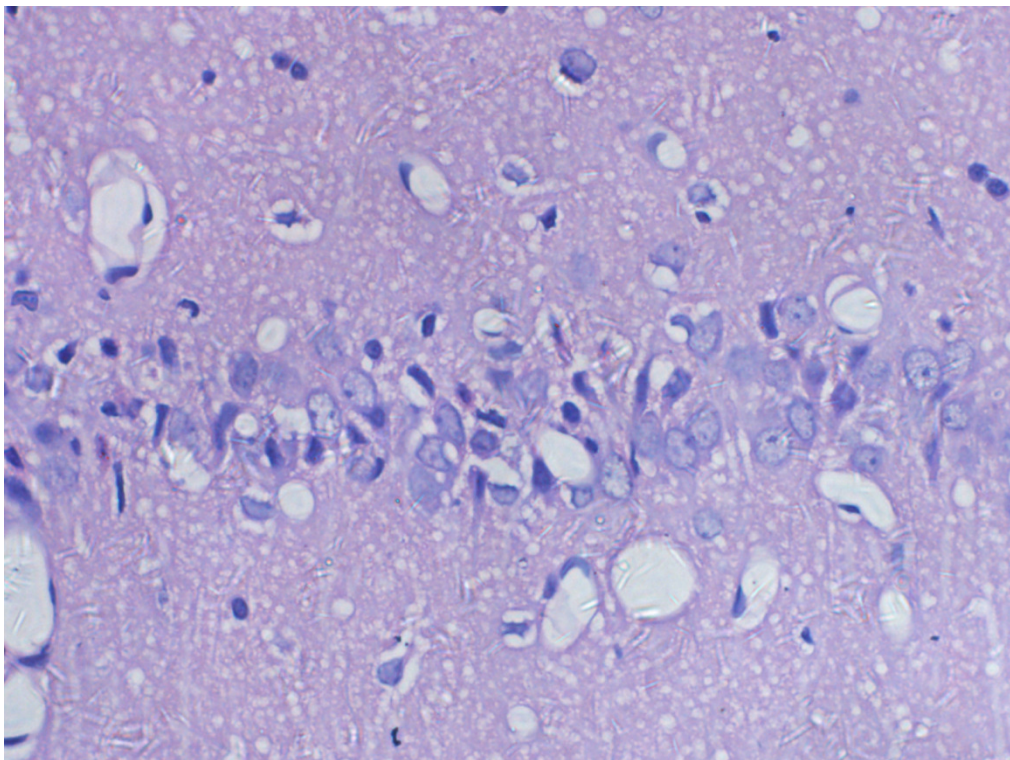

O<sub>2</sub>\_3h\_6



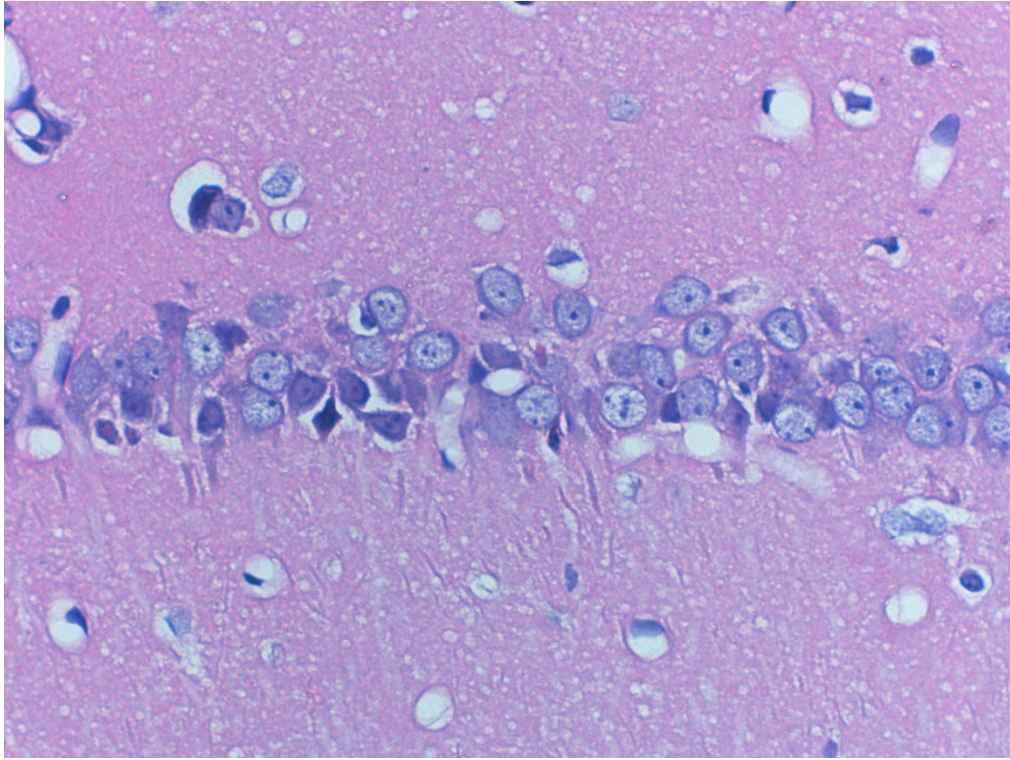

O<sub>2</sub>\_3h\_7

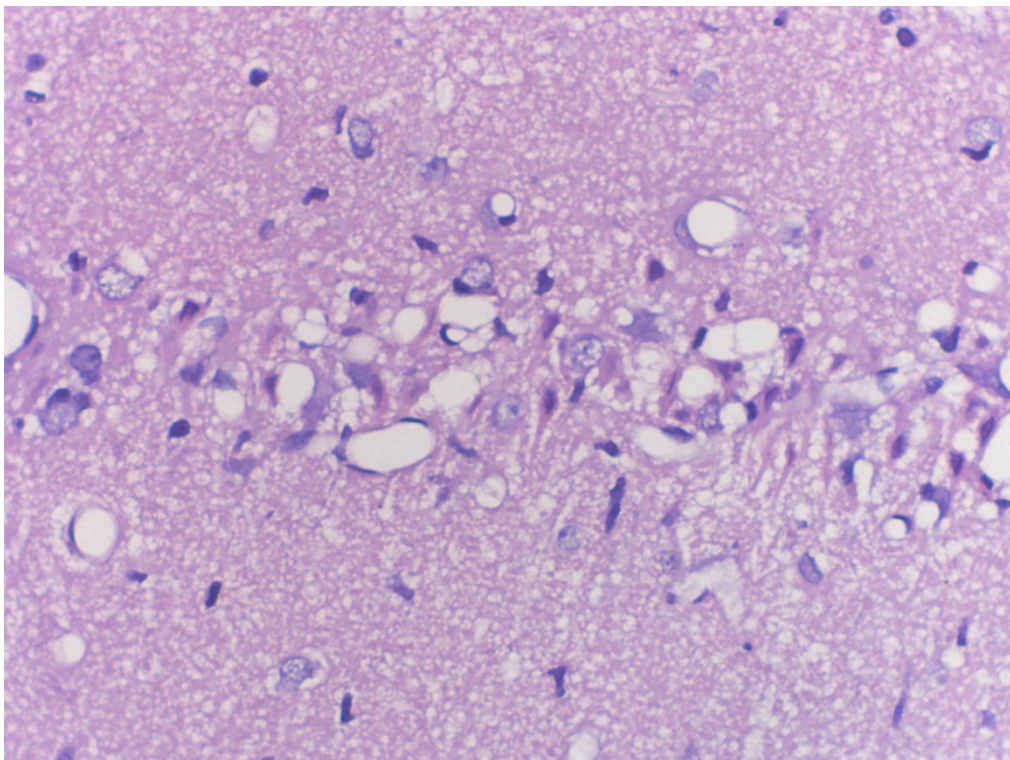

O<sub>2</sub>\_3h\_9



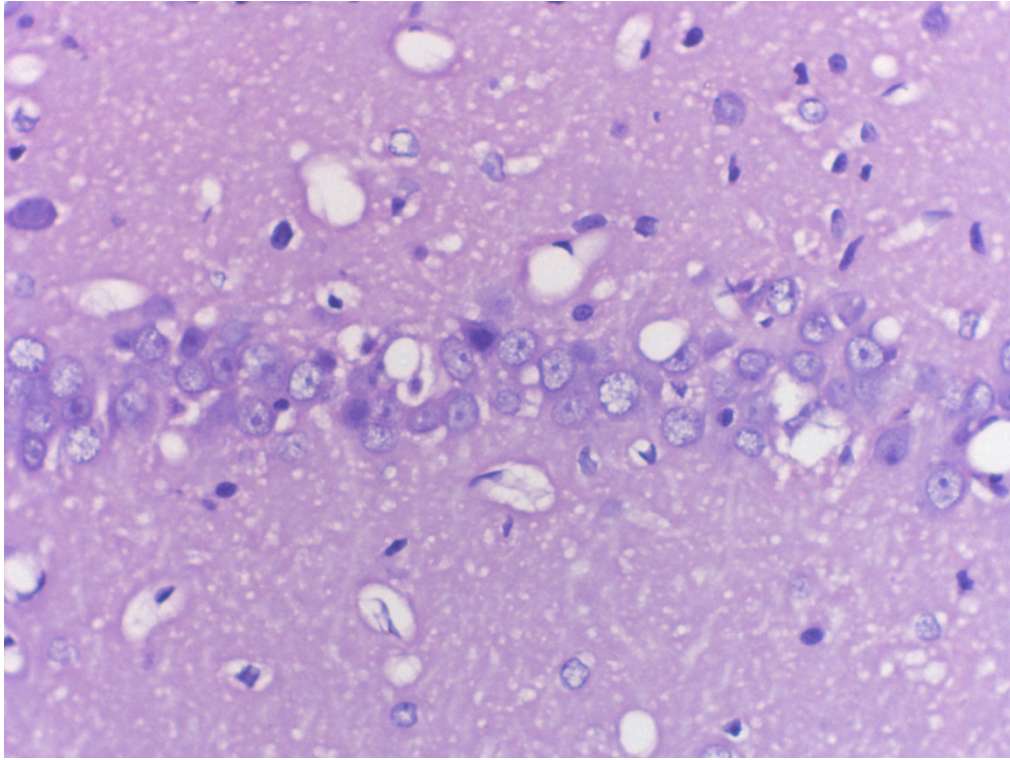

O<sub>2</sub>\_3h\_11

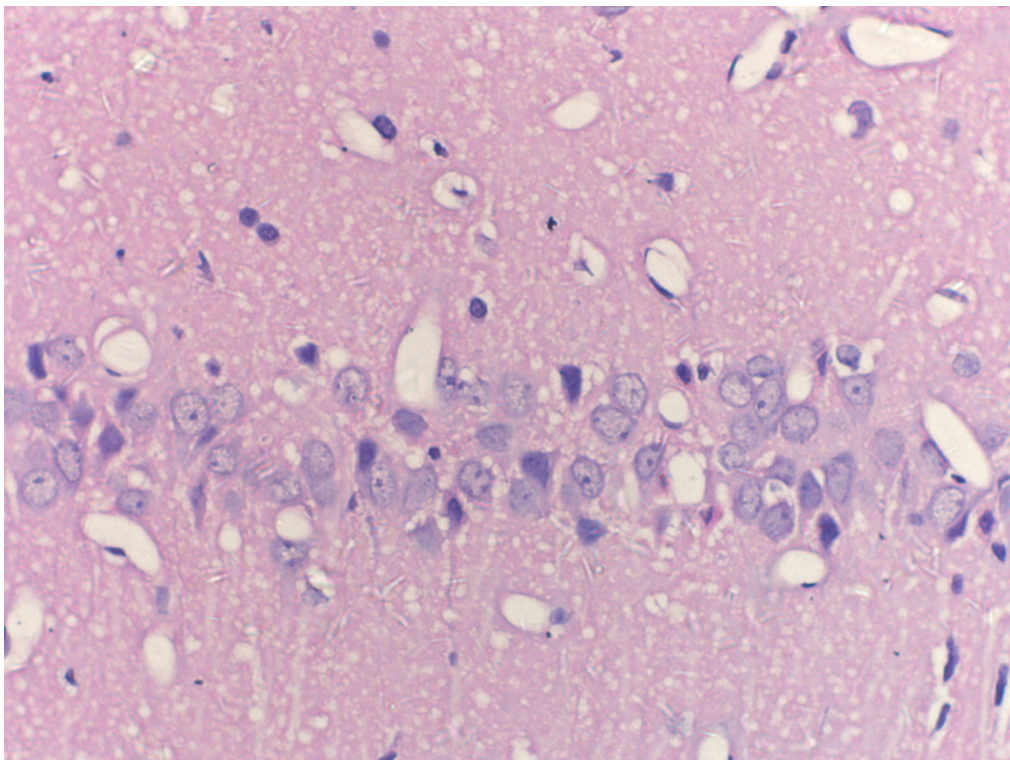

O<sub>2</sub>\_3h\_12



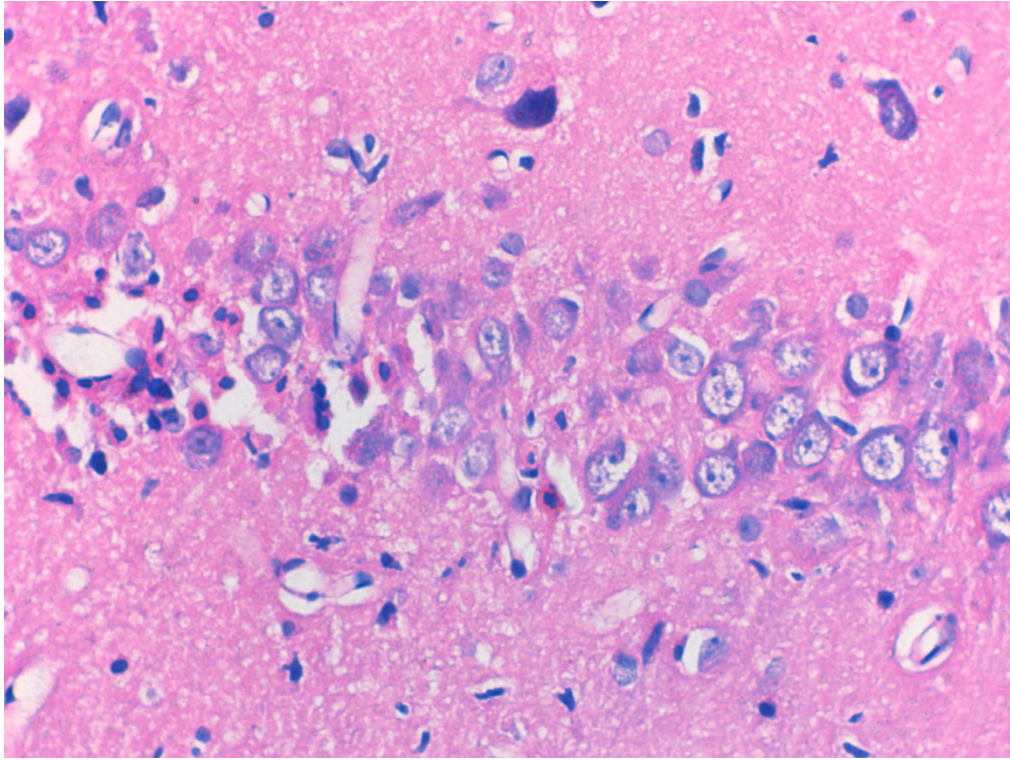

O<sub>2</sub>\_3h\_13

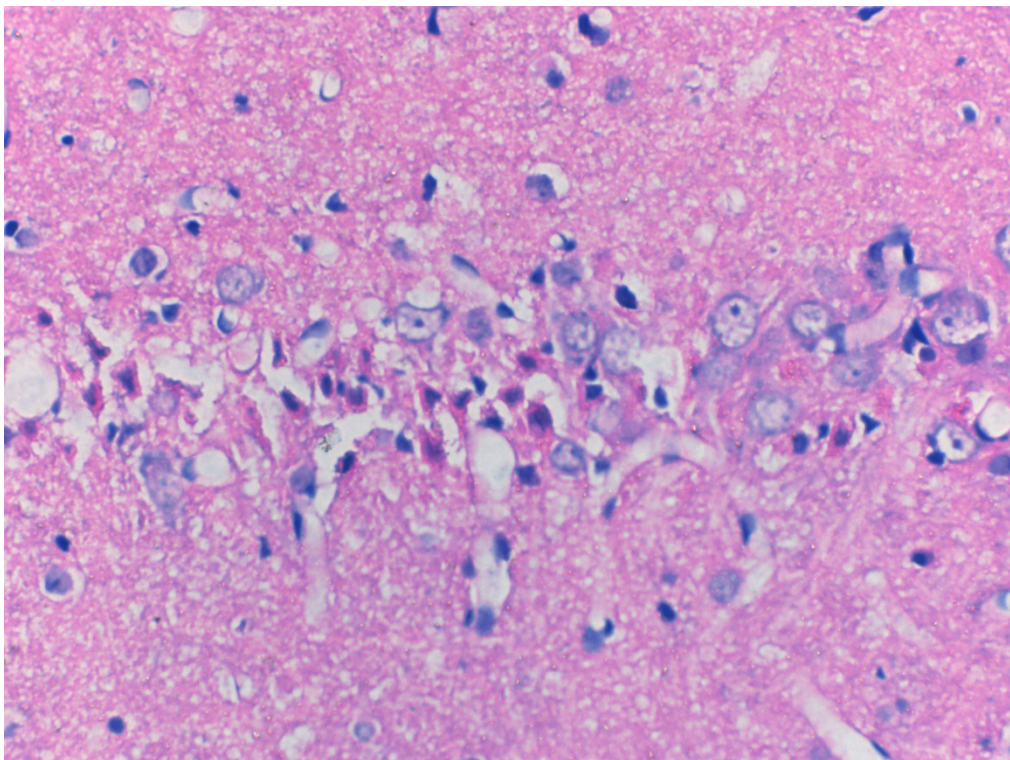

O<sub>2</sub>\_3h\_14



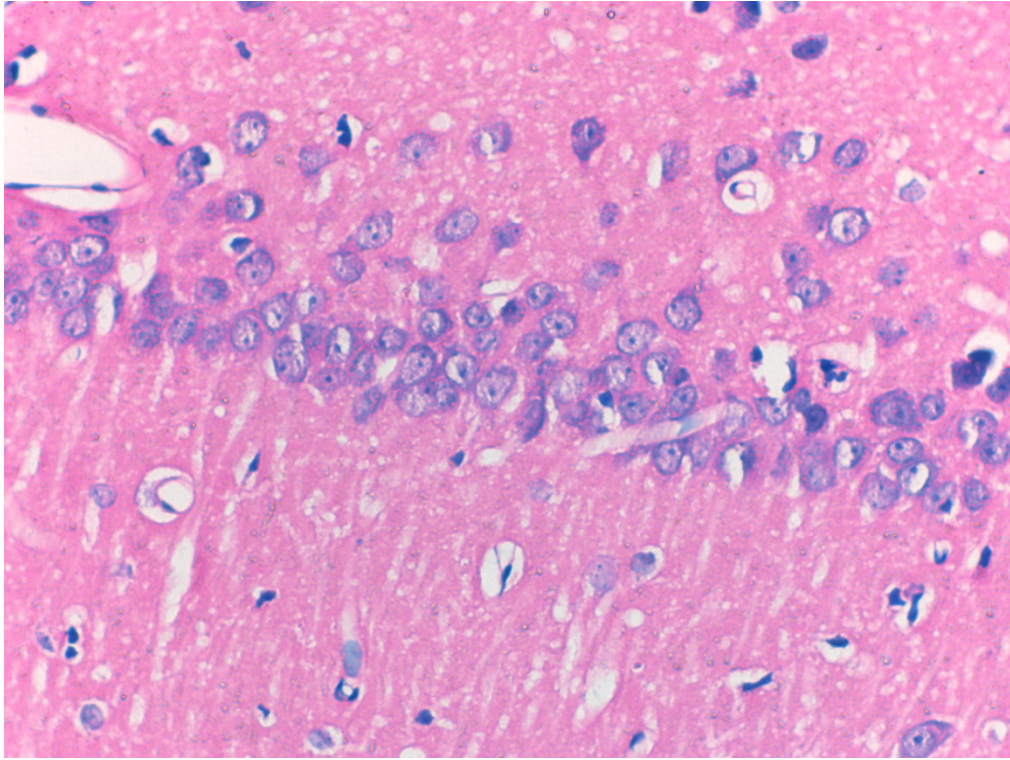

O<sub>2</sub>\_3h\_15

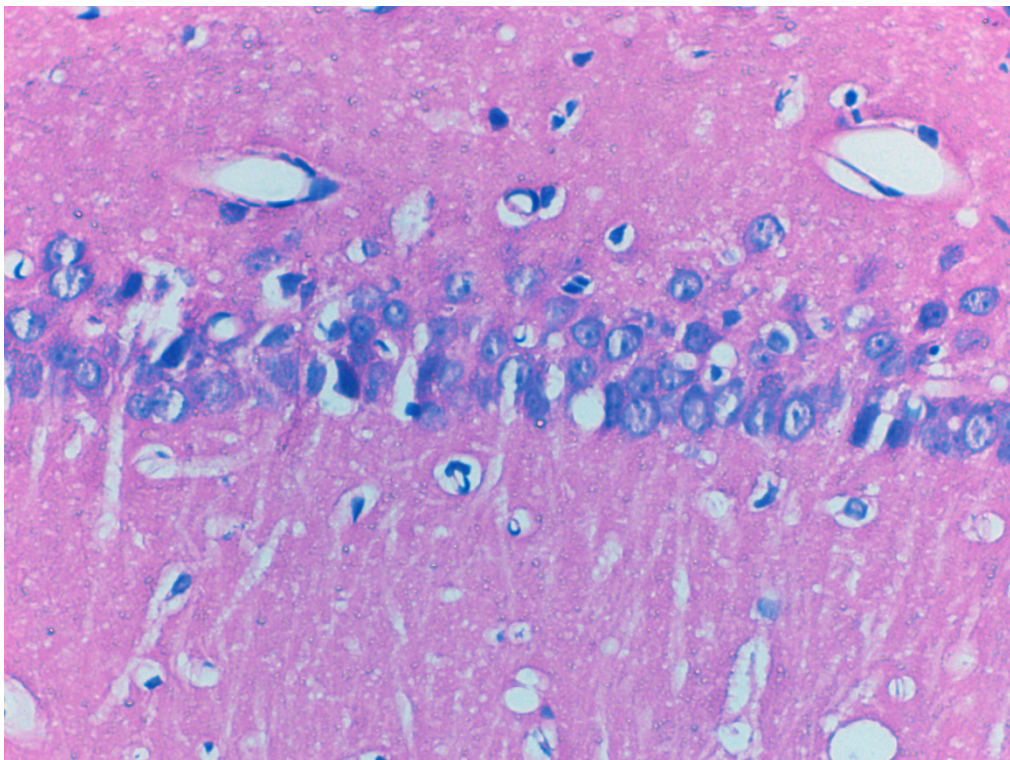

O<sub>2</sub>\_3h\_16



(E). ventilated with 100% oxygen for 5 (O<sub>2</sub>\_5h) hour group

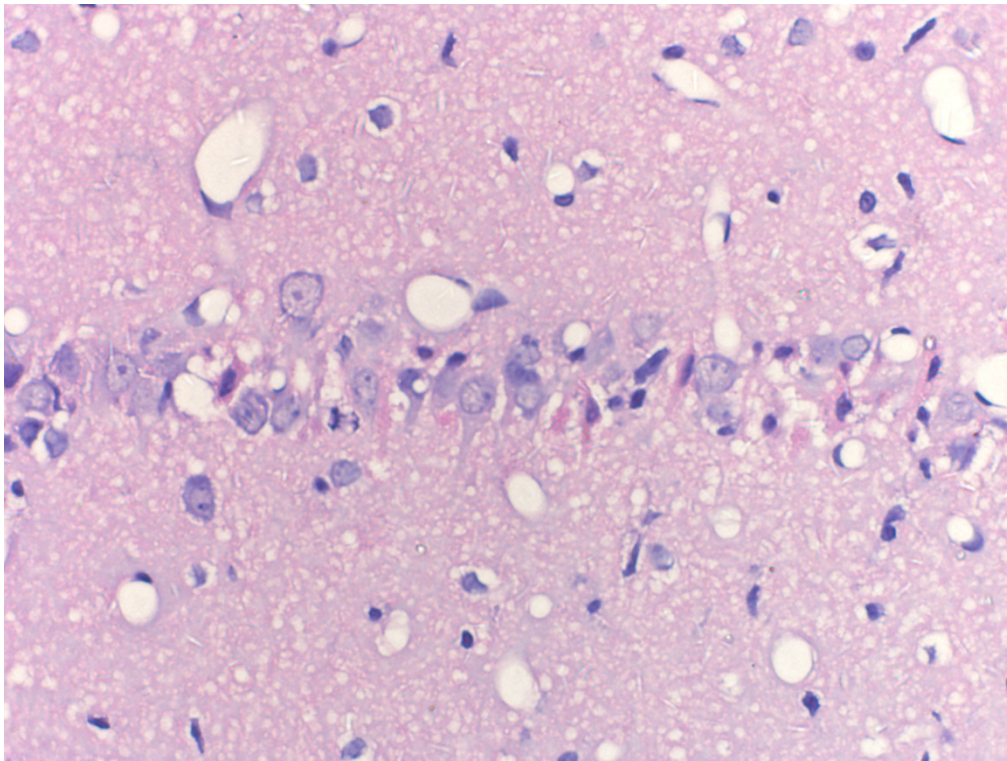

O<sub>2</sub>\_5h\_2

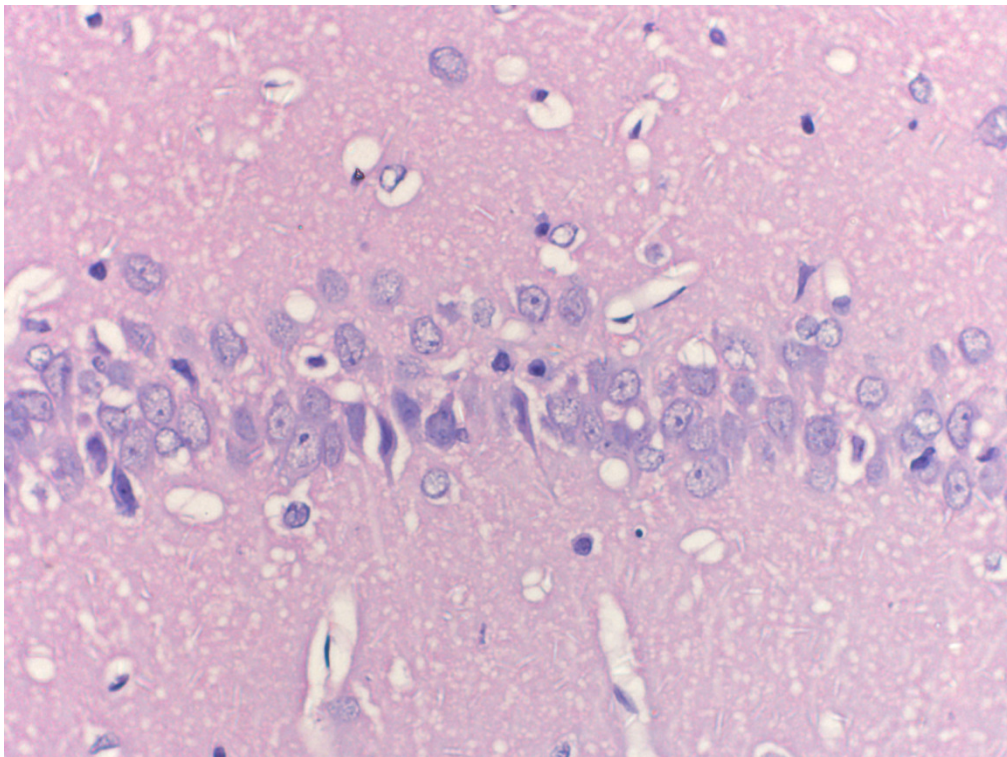

O<sub>2</sub>\_5h\_4



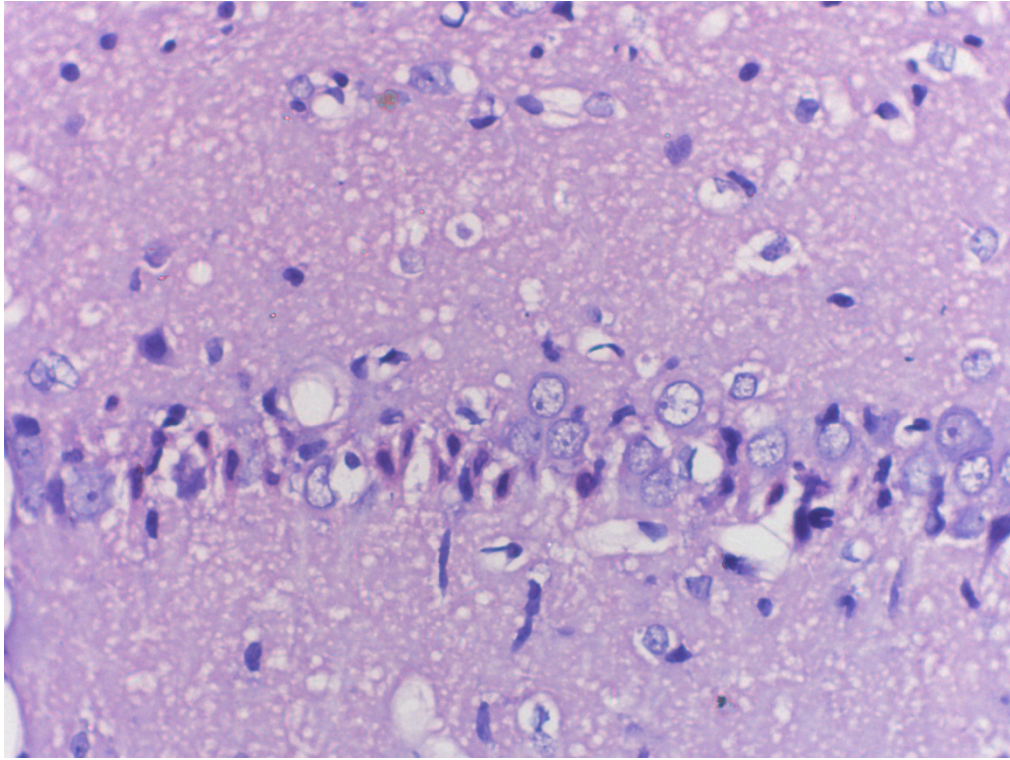

O<sub>2</sub>\_5h\_6

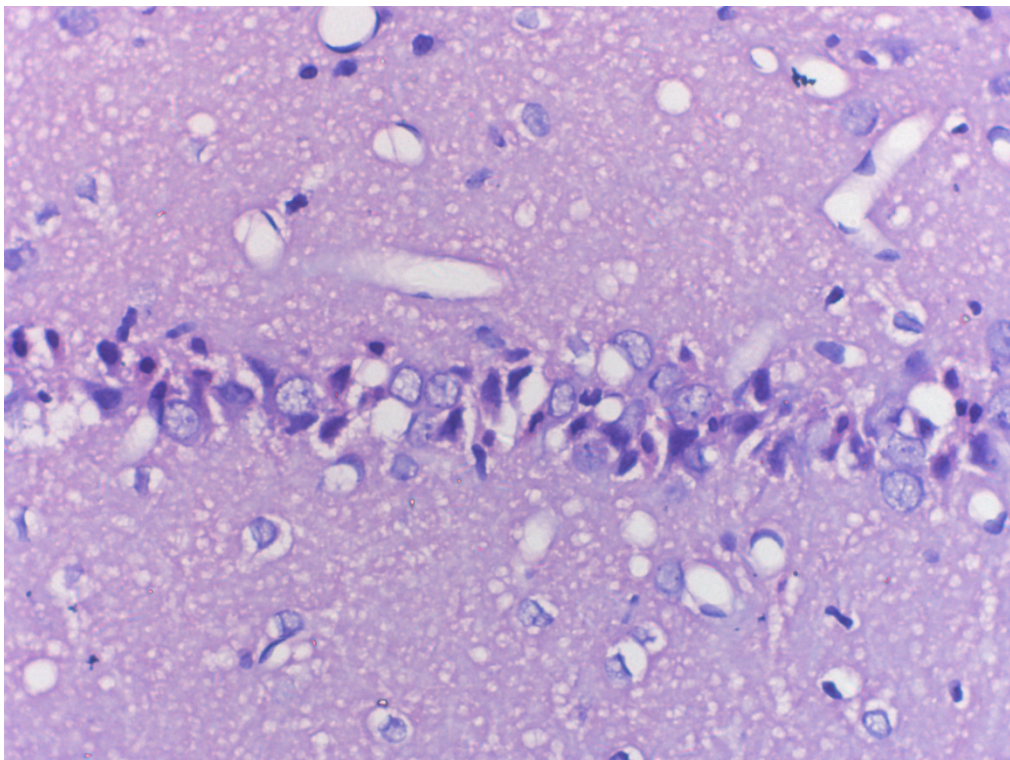

O<sub>2</sub>\_5h\_10



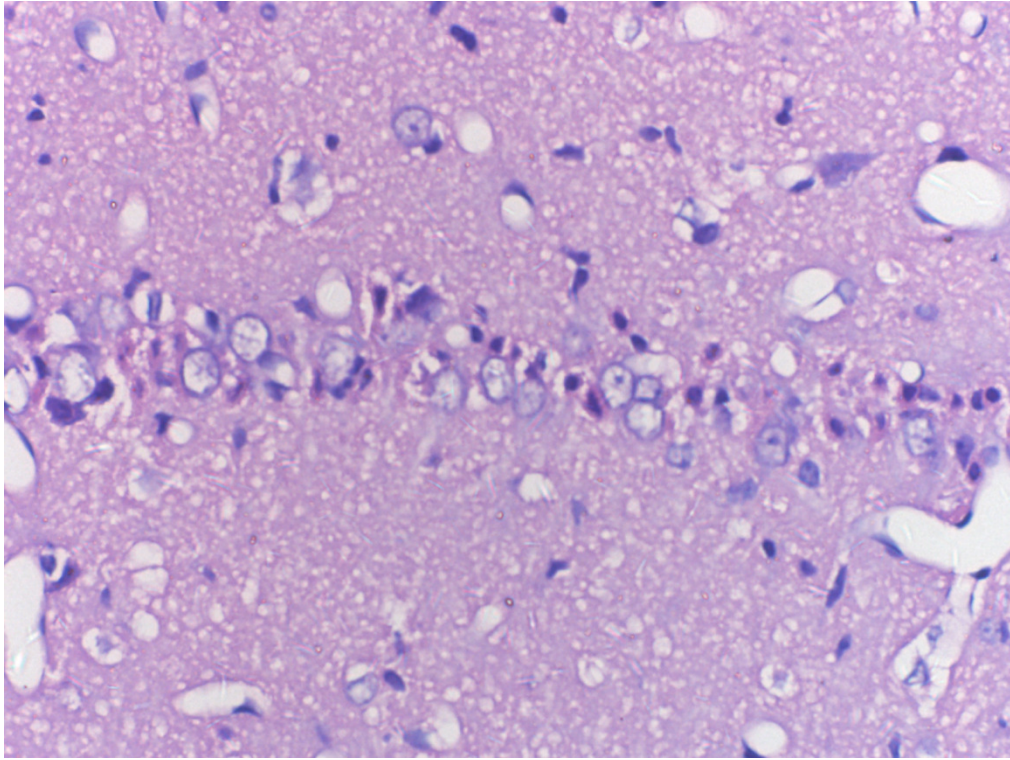

O<sub>2</sub>\_5h\_13

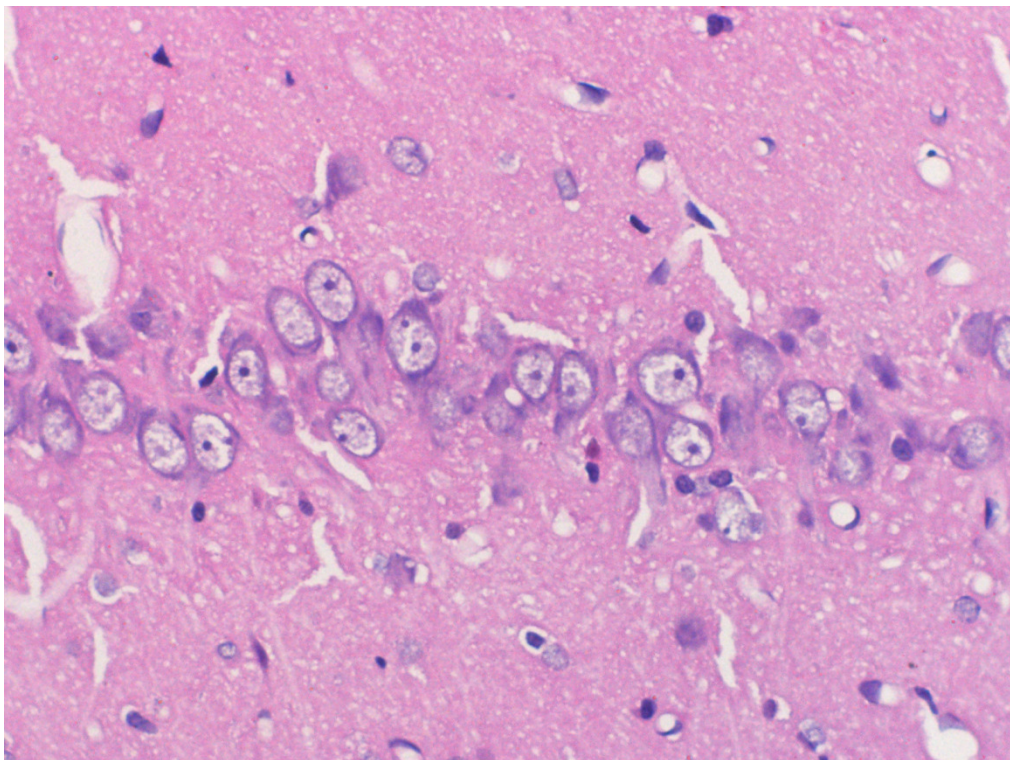

O<sub>2</sub>\_5h\_14



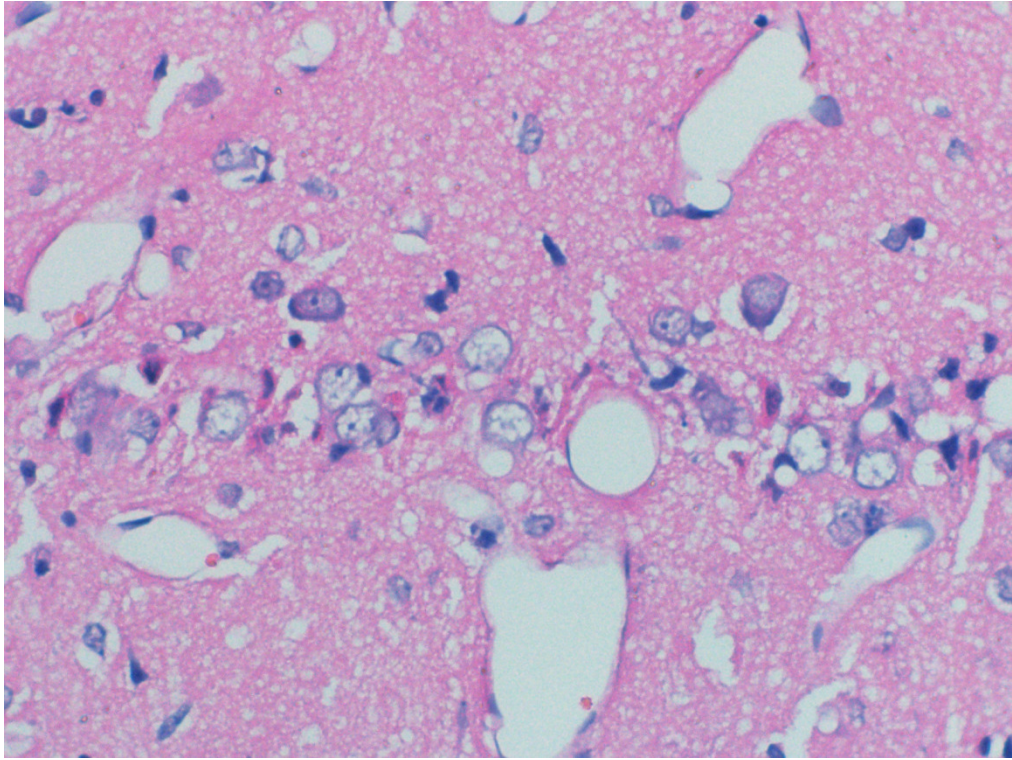

O<sub>2</sub>\_5h\_16
